# Supplementary material
Source: publisher figshare collection journal article supplement (https://frontiersin.figshare.com/ndownloader/files/12461306)
Supplement: Supplementary file [file 12461306]

**Table S8** | Gene ontology analysis for red junglefowl and domestic chicken populations using DAVID version 6.8<sup>1</sup>.

**A. Red Junglefowl population**

| GO term    | Description                             | P value     | Genes                                                                                                                                                                                                                                 |
|------------|-----------------------------------------|-------------|---------------------------------------------------------------------------------------------------------------------------------------------------------------------------------------------------------------------------------------|
| GO:0050789 | Regulation of biological process        | 0.009225514 | <i>ADCY1, AL158801.1, <b>EBF2</b>, KCNA5, <b>PPP2R2A</b>, CCND2, NAB1, NEFM, FURIN, <b>BMP10</b>, GNRH1, <b>ARHGAP25</b>, <b>MYCL</b>, NPY2R, RHOBTB2, PDIA3, ZNF302, BCAR3, NKX2-6, ADAM9, ZFHX4, <b>KCNMA1</b>, RCAN3, PAFAH1B1</i> |
| GO:0051246 | Regulation of protein metabolic process | 0.015403594 | <i>AL158801.1, CCND2, ADAM9, FURIN, <b>BMP10</b></i>                                                                                                                                                                                  |
| GO:0006810 | Transport                               | 0.020966967 | <i>SCN2A, ATP6V1B2, KCNA5, GRIK2, MFSD2A, SLC25A37, NEFM, KCNA1, FURIN, KCTD9, SLC16A5, <b>KCNMA1</b>, SLC26A8, PAFAH1B1</i>                                                                                                          |
| GO:0015672 | Monovalent inorganic cation transport   | 0.022221846 | <i>ATP6V1B2, KCNA5, KCNA1, KCTD9, <b>KCNMA1</b></i>                                                                                                                                                                                   |
| GO:0022836 | Gated channel activity                  | 0.024342944 | <i>KCNA5, GRIK2, KCNA1, KCTD9, <b>KCNMA1</b></i>                                                                                                                                                                                      |
| GO:0008088 | Axon cargo transport                    | 0.039408326 | <i>NEFM, PAFAH1B1</i>                                                                                                                                                                                                                 |
| GO:0051592 | Response to calcium ion                 | 0.045827198 | <i>ADAM9, <b>KCNMA1</b></i>                                                                                                                                                                                                           |

Note: Genes in bold overlap with other genes selected in domestic chicken populations

**B. Ethiopian domestic chicken population**

| GO term    | Description                    | P value | Genes              |
|------------|--------------------------------|---------|--------------------|
| GO:0019229 | Regulation of vasoconstriction | 0.01063 | <i>HRH1, AGTR1</i> |

<sup>1</sup> <https://david.ncifcrf.gov/>

### C. Saudi Arabian domestic chicken population

| GO term    | Description                                         | P value  | Genes                                                                                                               |
|------------|-----------------------------------------------------|----------|---------------------------------------------------------------------------------------------------------------------|
| GO:0008015 | Blood circulation                                   | 0.004766 | <i>PRKG1, PDE5A, SEMA3A, PDE3A, HDAC4, CTNNA3, CACNA1G, GCLC</i>                                                    |
| GO:0008016 | Regulation of heart contraction                     | 0.007859 | <i>PDE5A, SEMA3A, HDAC4, CTNNA3, CACNA1G</i>                                                                        |
| GO:0090257 | Regulation of muscle system process                 | 0.009369 | <i>PRKG1, PDE5A, MTPN, HDAC4, CTNNA3</i>                                                                            |
| GO:0051094 | Positive regulation of developmental process        | 0.010359 | <i>TSHR, PDE5A, RHOB, SIRT1, PROX1, FLRT2, SEMA3A, RIMS1, PDE3A, IMPACT, MAP2K1, TMEM30A, HIF1AN</i>                |
| GO:0006886 | Intracellular protein transport                     | 0.011917 | <i>RHOB, SEC24C, RABGAP1L, MYO6, RIMS1</i>                                                                          |
| GO:0060284 | Regulation of cell development                      | 0.016126 | <i>PDE5A, PROX1, FLRT2, SEMA3A, RIMS1, PDE3A, HDAC4, IMPACT, MYCL, MAP2K1, TMEM30A</i>                              |
| GO:0070301 | Cellular response to hydrogen peroxide              | 0.017447 | <i>RHOB, SIRT1, IMPACT</i>                                                                                          |
| GO:0008206 | Bile acid metabolic process                         | 0.018957 | <i>AKR1D1, SIRT1, PROX1</i>                                                                                         |
| GO:0045892 | Negative regulation of transcription, DNA-templated | 0.019806 | <i>SIRT1, TFDP2, PHF14, FRK, PROX1, DACH1, HDAC4, IMPACT, AICDA, HIF1AN, GCLC</i>                                   |
| GO:1902679 | Negative regulation of RNA biosynthetic process     | 0.022875 | <i>SIRT1, TFDP2, PHF14, FRK, PROX1, DACH1, HDAC4, IMPACT, AICDA, HIF1AN, GCLC</i>                                   |
| GO:0043502 | Regulation of muscle adaptation                     | 0.02443  | <i>PDE5A, MTPN, HDAC4</i>                                                                                           |
| GO:0005912 | Adherens junction                                   | 0.025717 | <i>RHOB, TNS3, ARHGAP22, TLN2, FLRT2, RSU1, CTNNA3, RPL4</i>                                                        |
| GO:0042391 | Regulation of membrane potential                    | 0.026217 | <i>RIMS1, NETO1, KCNMA1, CTNNA3, CACNA1G, GCLC</i>                                                                  |
| GO:2000243 | Positive regulation of reproductive process         | 0.028393 | <i>PDE5A, SEMA3A, PDE3A</i>                                                                                         |
| GO:0045595 | Regulation of cell differentiation                  | 0.030314 | <i>SIRT1, GLG1, PROX1, SEMA3A, RIMS1, MYCL, MAP2K1, TMEM30A, HIF1AN, PDE5A, FLRT2, HDAC4, PDE3A, IMPACT, COL5A2</i> |
| GO:0055117 | Regulation of cardiac muscle contraction            | 0.030465 | <i>PDE5A, HDAC4, CTNNA3</i>                                                                                         |
| GO:0044712 | Single-organism catabolic process                   | 0.030569 | <i>RP11-240B13.2, PDE5A, GK5, AKR1D1, ABHD5, LPIN1, PDE3A, HDAC4, USP13</i>                                         |
| GO:0009117 | Nucleotide metabolic process                        | 0.039809 | <i>TSHR, PDE5A, PRPS2, RP11-411B6.6, GRM8, MDH1B, PDE3A, HDAC4</i>                                                  |
| GO:0019934 | Cgmp-mediated signaling                             | 0.040082 | <i>PRKG1, PDE3A</i>                                                                                                 |
| GO:0034983 | Peptidyl-lysine deacetylation                       | 0.040082 | <i>SIRT1, HDAC4</i>                                                                                                 |
| GO:0019693 | Ribose phosphate metabolic process                  | 0.040998 | <i>TSHR, PDE5A, PRPS2, RP11-411B6.6, GRM8, PDE3A, HDAC4</i>                                                         |
| GO:0005875 | Microtubule associated complex                      | 0.045734 | <i>DYNCL11, SNX4, KIF26B, BORCS5</i>                                                                                |

|            |                                  |          |                                                                                                                           |
|------------|----------------------------------|----------|---------------------------------------------------------------------------------------------------------------------------|
| GO:0044281 | Small molecule metabolic process | 0.045786 | <i>GK5, PRPS2, SIRT1, LARS2, PROX1, GRM8, LPIN1, ASNSD1, MDH1B, GCLC, PDE5A, TSHR, AKR1D1, RP11-411B6.6, HDAC4, PDE3A</i> |
|------------|----------------------------------|----------|---------------------------------------------------------------------------------------------------------------------------|

#### D. Sri Lankan domestic chicken population

| GO term    | Description                       | P value | Genes              |
|------------|-----------------------------------|---------|--------------------|
| GO:0016500 | protein-hormone receptor activity | 0.04484 | <i>TSHR, MCHR1</i> |
